# Supplementary material for: A simple NIR fluorescent probe for detecting pH in actual water samples and cells
Source: Royal Society of Chemistry journal article supplement (doi:10.1039/d5ay01593f), 2025-01-01
Supplement: d5ay01593f1.pdf [file d5ay01593f1.pdf]

## Supporting information

### Simple NIR fluorescent probe for detecting pH in actual water samples and cells

Qing Mei <sup>a</sup>, Rui-Zhen Zhang <sup>a</sup>, Feng Li <sup>a, b\*</sup>

<sup>a</sup> *College of Biological and Chemical Engineering, Qilu Institute of Technology, Jinan, 250200, PR China.*

<sup>b</sup> *School of Chemistry and Chemical Engineering, Shandong University, Jinan, 250100, P.R. China.*

<sup>\*</sup> *Corresponding author. E-mail address: fengl96@163.com*

#### ***Apparatus and material***

The Bruker Avance 400 MHz spectrometer was used to get the NMR spectra. The Tensor II IR spectrophotometer (Bruker) was used to get the IR spectra. The Bruker Impact II spectrograph was used to obtain the mass spectra. The fluorescence spectrum was recorded by the PerkinElmer LS-55 and Hitachi F-4700 fluorescence spectrophotometer, the UV-Vis absorption spectra was obtained by a Hitachi U-4100 spectrophotometer. The YouKe PHS-3C pH-meter was used to measure the pH of test solutions. Cell imaging was performed by ultra-high resolution confocal laser microscopy (ZEISS, LSM 900 with Airyscan). Unless otherwise stated, all reagents and solvents were purchased from commercial provider. Twice-distilled water was used in

experiments.

### *Calculation of $pK_a$*

$pK_a$  value of **FC** was obtained by linear regression analysis of the fluorescence titration curve.

$$pK_a - pH = \log [(R_{\max} - R) / (R - R_{\min})]$$

In the fluorescent emission spectra of **FC**, where  $R$  was the fluorescence intensity ( $I_{655}$ ) measured at varying pH values,  $R_{\max}$  and  $R_{\min}$  were the fluorescence intensity ratio ( $I_{655}$ ) measured at pH 8 and 3, respectively.

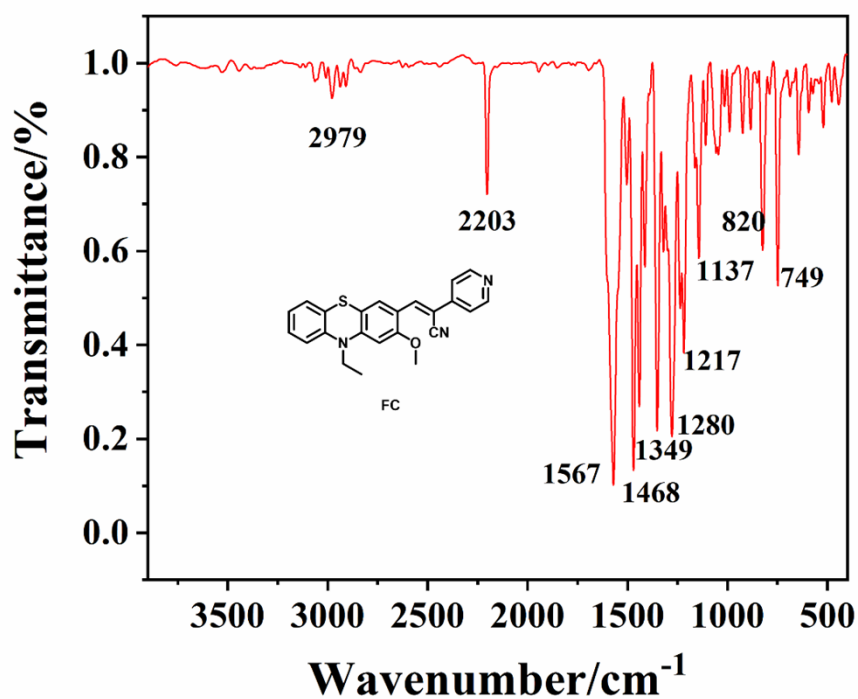

**Figure S1** The infrared spectrum of **FC**.

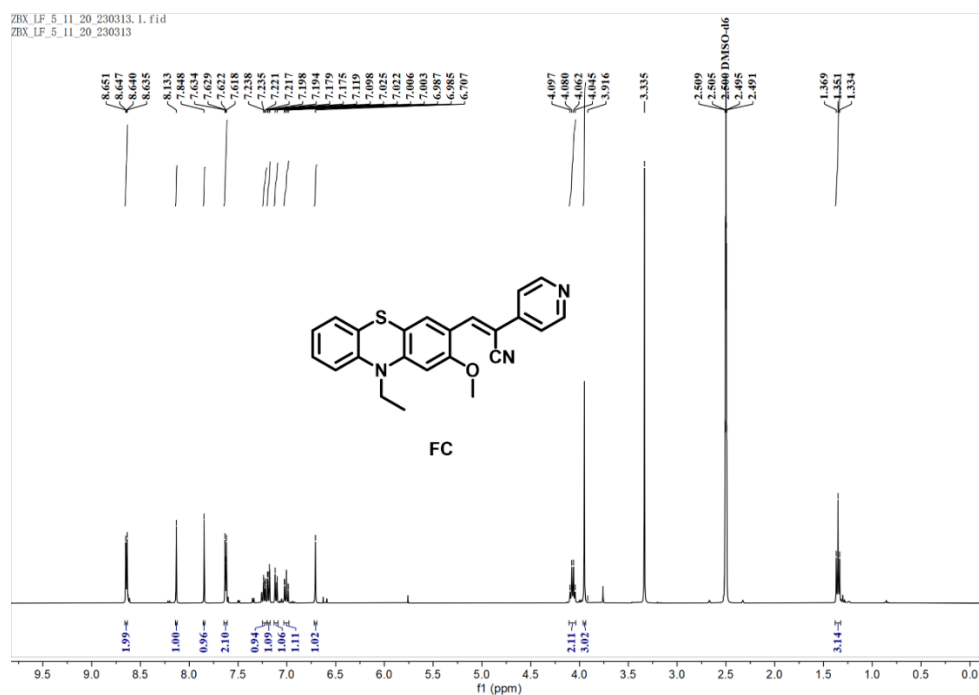

**Figure S2** The  $^1\text{H}$  NMR spectrum of **FC** in  $\text{DMSO-}d_6$ .

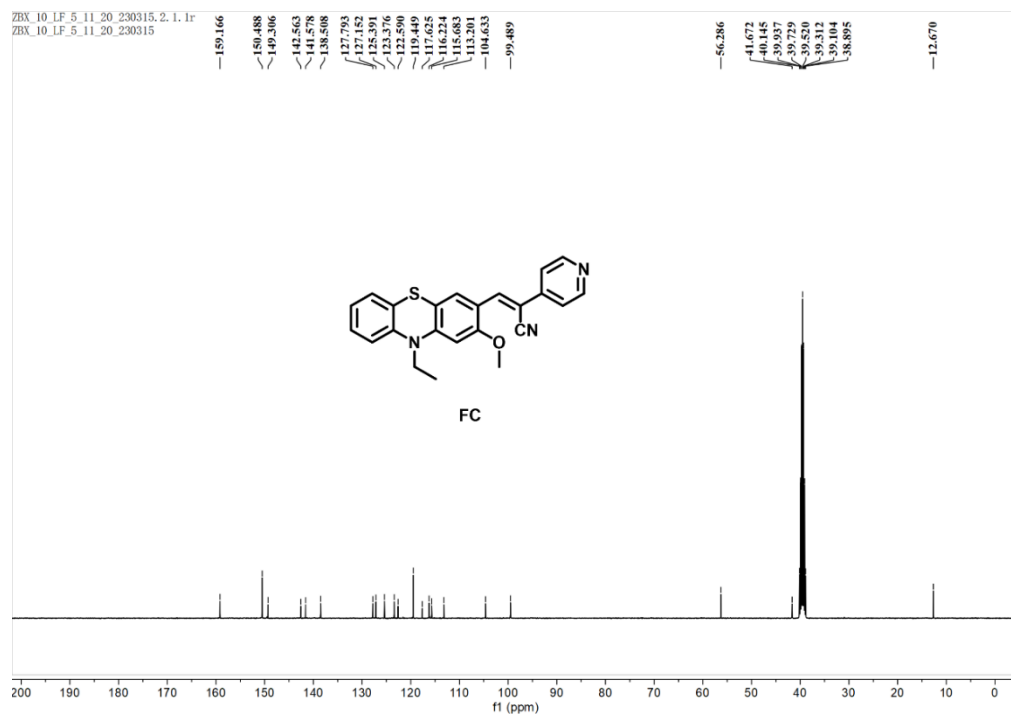

**Figure S3** The  $^{13}\text{C}$  NMR spectrum of **FC** in  $\text{DMSO-}d_6$ .

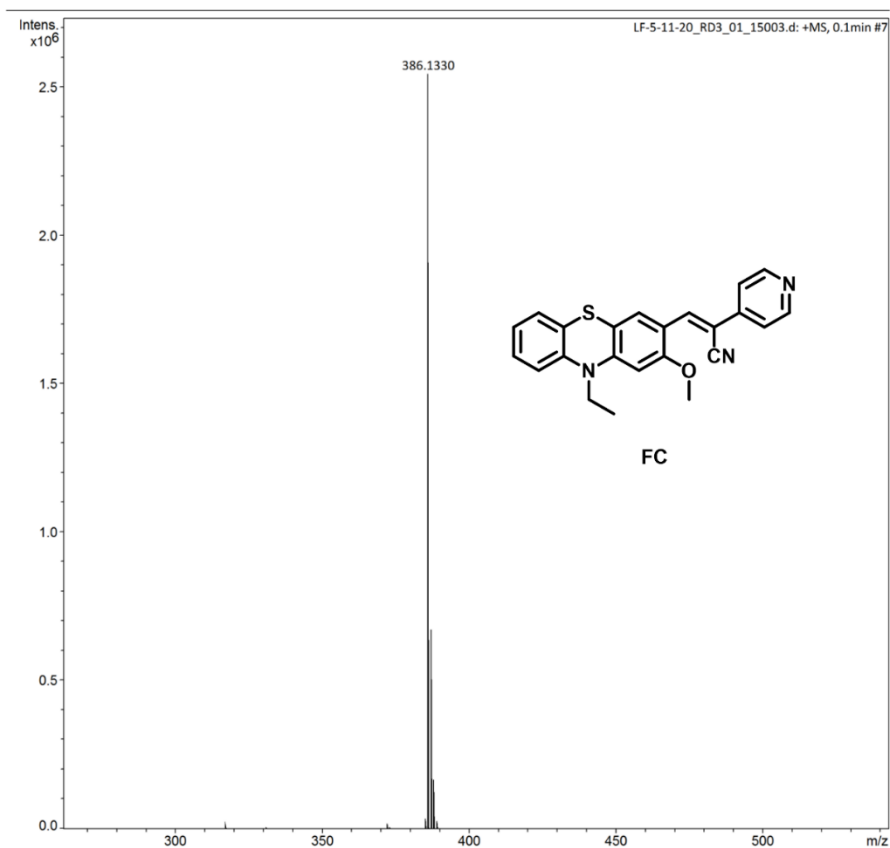

**Figure S4** The HRMS spectrum of FC [ $M+H^+$ ].

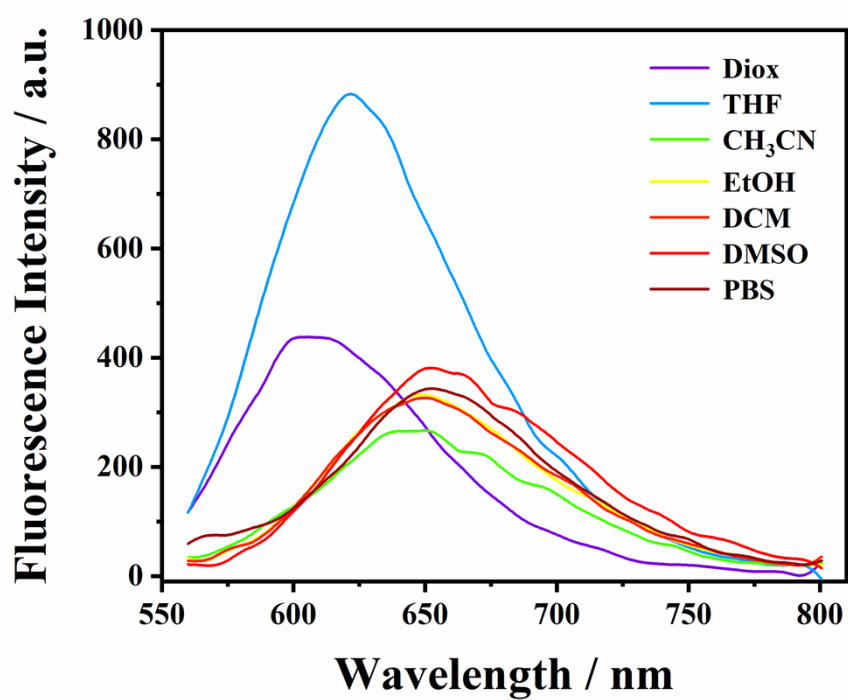

**Figure S5** The fluorescence spectrum of FC in different solvents.

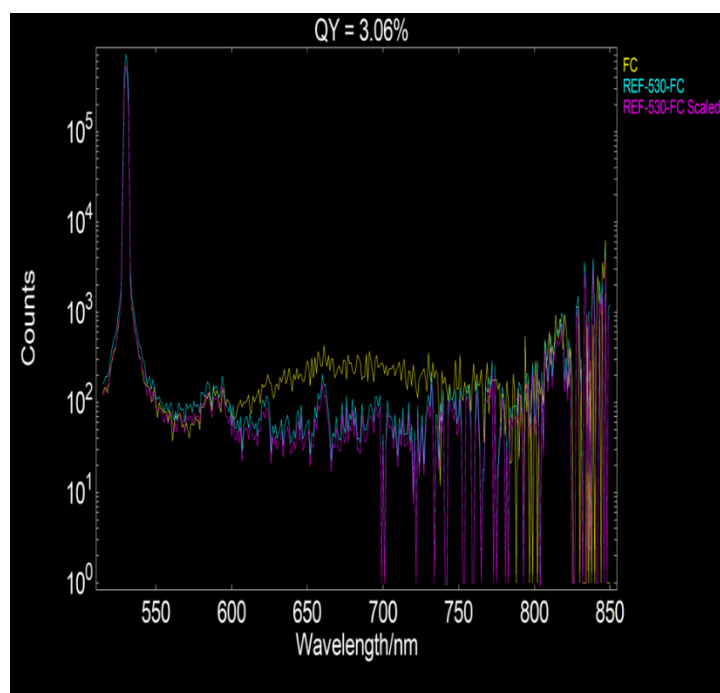

**Figure S6** The fluorescence quantum yield of FC (pH = 8.0).

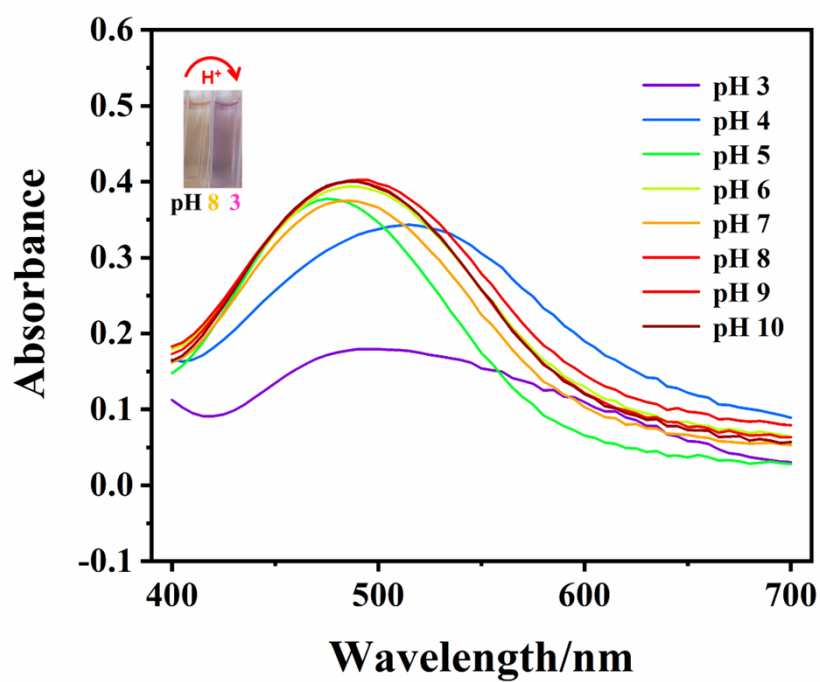

**Figure S7** UV-vis absorption spectrum of FC (40  $\mu$ M) in different pH.

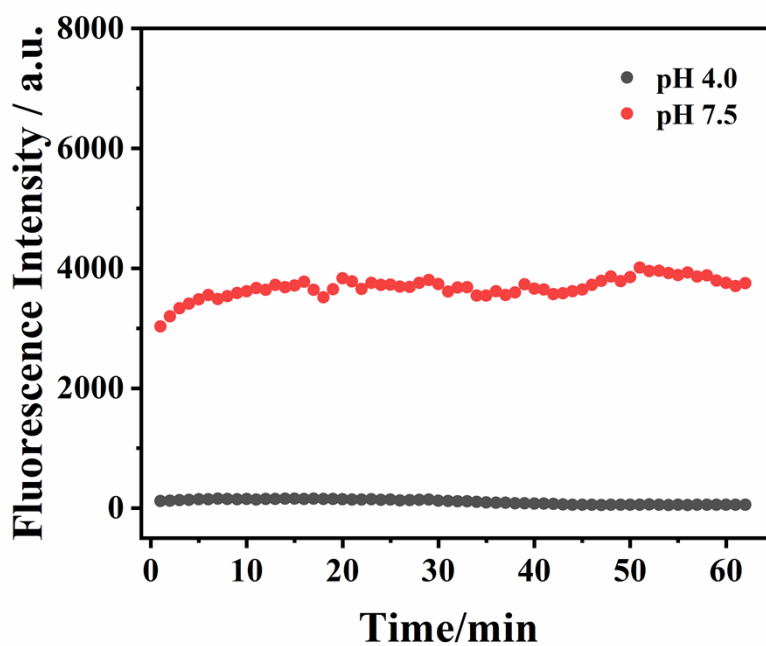

**Figure S8** The photostability of FC in different pH values by Hitachi F-4700 fluorescence spectrophotometer.

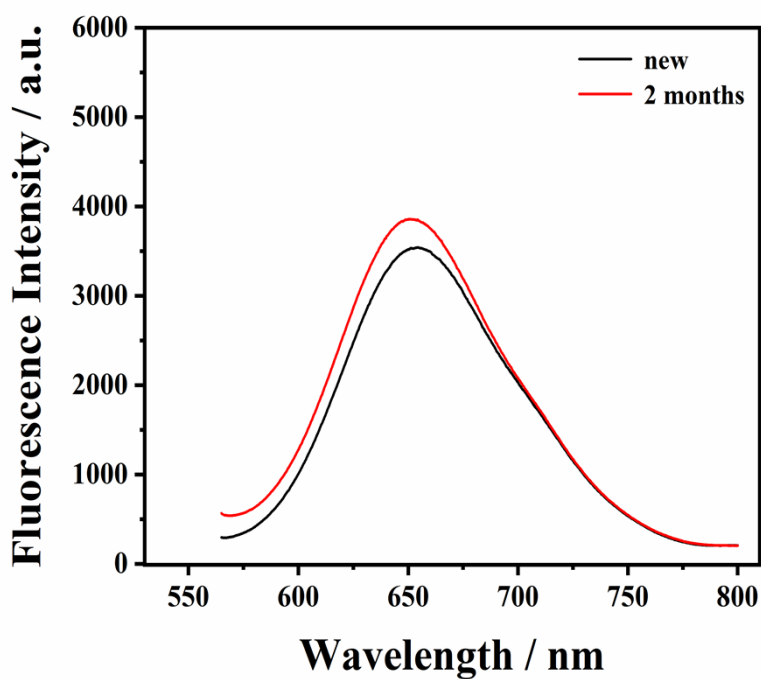

**Figure S9** The storage stability of FC after being prepared as a stock solution by Hitachi F-4700 fluorescence spectrophotometer.

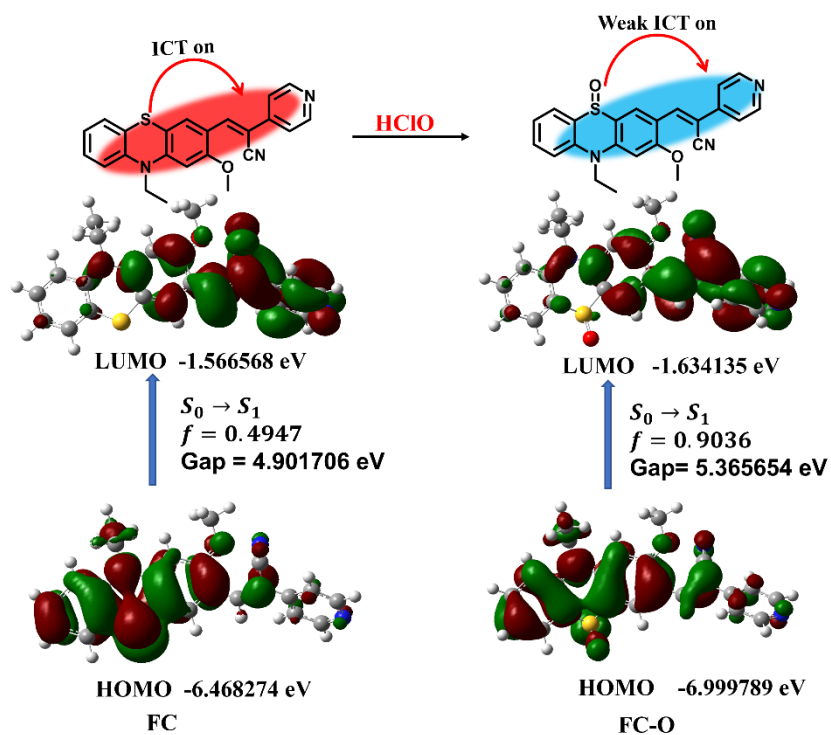

**Figure S10** The frontier molecular orbital plots and energies of FC and the product (FC-O) formed after FC react with HClO.

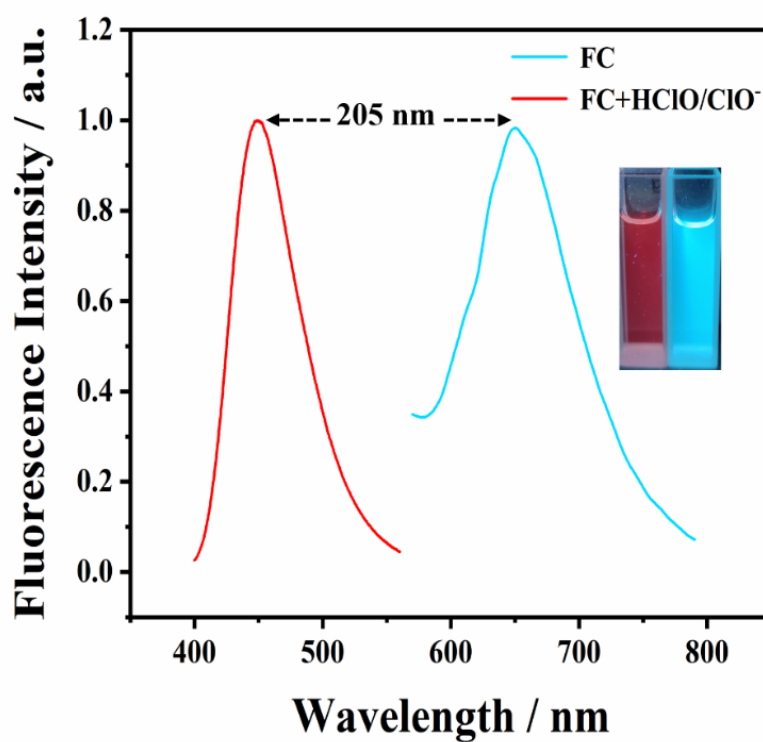

**Figure S11** The emission peak spacing before and after FC responds to  $\text{HClO}/\text{ClO}^-$ .

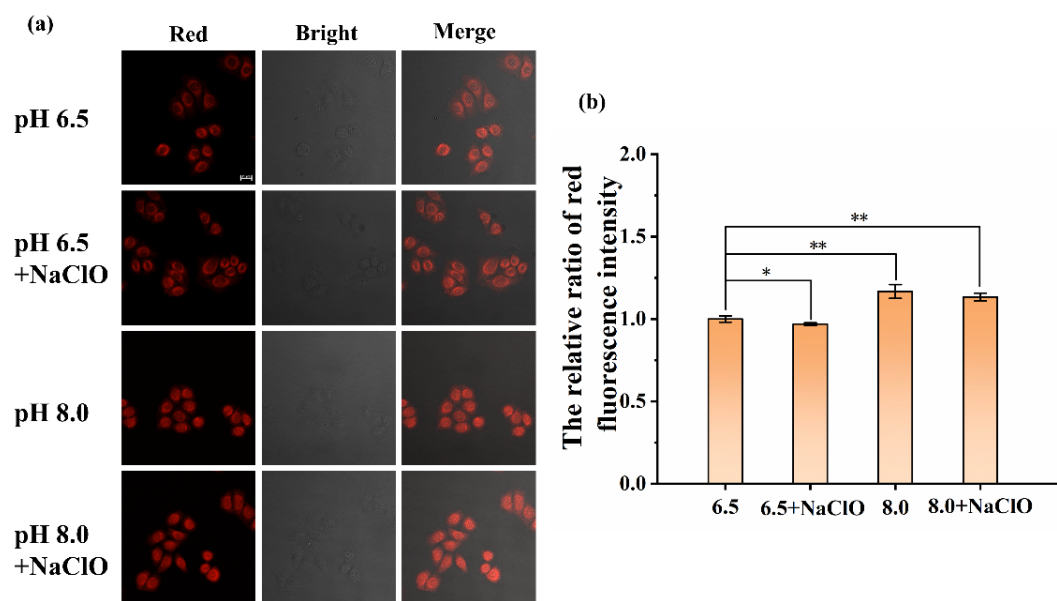

**Figure S12** (a) Confocal cell imaging of FC toward pH with or without NaClO. (b)

The relative ratio of red fluorescence intensity. Cells were cultured by FC (5 μM) for 30 min, and then cultured with different pH of high-K buffer (6.5, 8.0) together with 1 μM nigericin, and with or without NaClO (200 μM) for 30 min ( $\lambda_{\text{ex}} = 488 \text{ nm}$ ; red channel: 560-700 nm; \*p < 0.05; \*\*p < 0.01; Scale bar = 20 μm. Expressed as the data average±SD, n = 3).



**Table S1** Comparison of recent fluorescent probes for pH.

| Probe                                                                               | $\lambda_{\text{ex}}/\lambda_{\text{em}}$<br>(nm) | Detect<br>range | Linear<br>range | pKa       | Quantum<br>yield                                         | Response<br>time | Solvent<br>system                | Ref.                                               |
|-------------------------------------------------------------------------------------|---------------------------------------------------|-----------------|-----------------|-----------|----------------------------------------------------------|------------------|----------------------------------|----------------------------------------------------|
| 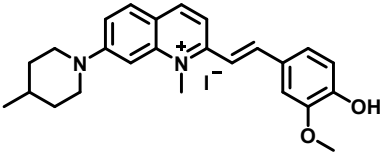   | 488/630                                           | pH 6.0-11.0     | pH 6.5-10       | 8.53      | pH = 6.0,<br>$\Phi=1.10\%$ ;<br>pH=8.5,<br>$\Phi=0.81\%$ | ---              | PBS: EtOH =<br>7: 3              | Sens. Actuators, B,<br>373 (2022) 132732           |
|    | 620/741                                           | pH 1.1-9.0      | pH 3.0-5.5      | 4.41      | ---                                                      | ---              | H <sub>2</sub> O: EtOH =<br>7: 3 | Spectrochim. Acta,<br>Part A, 278 (2022)<br>121368 |
|   | 580/646                                           | pH 5.0-8.0      | pH 5.6-7.2      | 6.54      | ---                                                      | 30 min           | BR: EtOH =<br>95: 5              | Spectrochim. Acta,<br>Part A, 280 (2022)<br>121496 |
|  | 420/602                                           | pH 7.14-12.41   | pH 9.41-11.30   | 10.2<br>5 | ---                                                      | ---              | PBS: EtOH =<br>6:4               | Microchem. J., 173<br>(2022) 107010                |

|                                                                                     |                 |                 |            |      |     |     |                                      |                                      |
|-------------------------------------------------------------------------------------|-----------------|-----------------|------------|------|-----|-----|--------------------------------------|--------------------------------------|
| 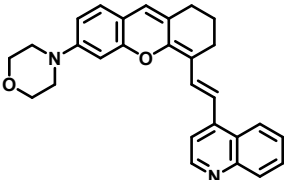   | 605/740         | pH 3-9          | ---        | 5.13 | --- |     | PBS:CH <sub>3</sub> CN<br>=7:3       | Chem. Eng. J., 464<br>(2023) 142554  |
|    | 390/445,<br>605 | pH 3.0-<br>13.0 | ---        | 6.92 | --- | --- | HEPES:DMS<br>O=1:1                   | Chem. Eng. J., 464<br>(2023) 142553  |
|    | 430/625         | pH 1.0-7.4      | pH 2.5-5.0 | 3.78 | --- | --- | PBS:DMSO=<br>99:1                    | Food Chem., 408<br>(2023) 135200     |
|   | 408/529         | pH 4.0-9.0      | pH 4-9     | ---  | --- | --- | H <sub>2</sub> O:1,4-<br>dioxane=1:9 | Microchem. J., 205<br>(2024) 111250. |
|  | 375/487,<br>585 | pH 1.0-8.0      | pH 3.0-5.5 | 5.41 | --- | --- | H <sub>2</sub> O:THF=8:<br>2         | Microchem. J., 204<br>(2024) 111169  |

|                                                                                    |              |            |            |      |                                                   |       |               |                                              |
|------------------------------------------------------------------------------------|--------------|------------|------------|------|---------------------------------------------------|-------|---------------|----------------------------------------------|
| 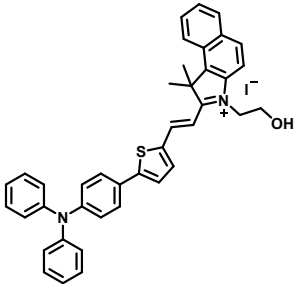  | 370/470      | pH 2-12    | ---        | ---  | ---                                               | ---   | PBS:DMSO=7:3  | Talanta, 281 (2025) 126849                   |
|   | 420/485, 608 | pH 6.0-9.0 | pH 7.2-8.0 | 7.6  | pH = 6.0, $\Phi=1.33\%$ ; pH = 9.0, $\Phi=0.96\%$ | ---   | PBS: EtOH=9:1 | Dyes Pigm., 233 (2025) 112544                |
|   | 420/482, 592 | pH 5.6-8.0 | pH 5.8-7.2 | 6.36 | ---                                               | ---   | PBS: EtOH=9:1 | Spectrochim. Acta, Part A, 339 (2025) 126262 |
|  | 530/655      | pH 3.0-8.0 | pH 4.0-6.6 | 5.8  | 3.06%                                             | 5 min | PBS buffer    | <b>This work</b>                             |
